# Supplementary material
Source: MDPI journal article supplement (https://www.mdpi.com/2071-1050/11/2/499)
Supplement: s1 [file s1]

## Supplementary Materials for

Policy hotspots for sustainability: changes in the EU regulation of sustainable finance and business

**Table S1.** List of legislative instruments

|   |                                                                                                                                                                                                                                                                                                                                                                                                                                                                                                                                                                                                                                                                                              |                             |
|---|----------------------------------------------------------------------------------------------------------------------------------------------------------------------------------------------------------------------------------------------------------------------------------------------------------------------------------------------------------------------------------------------------------------------------------------------------------------------------------------------------------------------------------------------------------------------------------------------------------------------------------------------------------------------------------------------|-----------------------------|
| 1 | DIRECTIVE 2014/95/EU OF THE EUROPEAN PARLIAMENT AND OF THE COUNCIL of 22 October 2014 amending Directive 2013/34/EU as regards disclosure of non-financial and diversity information by certain large undertakings and groups                                                                                                                                                                                                                                                                                                                                                                                                                                                                | <b>Business law</b>         |
| 2 | <b>Corporate social responsibility:</b> accountable, transparent and responsible business behaviour and sustainable growth European Parliament resolution of 6 February 2013 on corporate social responsibility: accountable, transparent and responsible business behaviour and sustainable growth (2012/2098(INI)) (2016/C 024/06)                                                                                                                                                                                                                                                                                                                                                         | <b>Business law</b>         |
| 3 | <b>Accounting Directive:</b> DIRECTIVE 2013/34/EU OF THE EUROPEAN PARLIAMENT AND OF THE COUNCIL of 26 June 2013 on the annual financial statements, consolidated financial statements and related reports of certain types of undertakings, amending Directive 2006/43/EC of the European Parliament and of the Council and repealing Council Directives 78/660/EEC and 83/349/EEC                                                                                                                                                                                                                                                                                                           | <b>Business law</b>         |
| 4 | <b>Branches Directive:</b> ELEVENTH COUNCIL DIRECTIVE of 21 December 1989 concerning disclosure requirements in respect of branches opened in a Member State by certain types of company governed by the law of another State ( 89 / 666 /EEC)<br>ELEVENTH COUNCIL DIRECTIVE of 21 December 1989 concerning disclosure requirements in respect of branches opened in a Member State by certain types of company governed by the law of another State ( 89 / 666 /EEC)<br>ELEVENTH COUNCIL DIRECTIVE of 21 December 1989 concerning disclosure requirements in respect of branches opened in a Member State by certain types of company governed by the law of another State ( 89 / 666 /EEC) | <b>Business law</b>         |
| 5 | <b>Transparency Directive:</b> DIRECTIVE 2004/109/EC OF THE EUROPEAN PARLIAMENT AND OF THE COUNCIL of 15 December 2004 on the harmonisation of transparency requirements in relation to information about issuers whose securities are admitted to trading on a regulated market and amending Directive 2001/34/EC                                                                                                                                                                                                                                                                                                                                                                           | <b>Business law</b>         |
| 6 | <b>Bank Accounting Directive:</b> COUNCIL DIRECTIVE 86/635/EEC of 8 December 1986 on the annual accounts and consolidated accounts of banks and other financial institutions                                                                                                                                                                                                                                                                                                                                                                                                                                                                                                                 | <b>Business law</b>         |
| 7 | <b>Insurance Accounting Directive:</b> Council Directive of 19 December 1991 on the annual accounts and consolidated accounts of insurance undertakings (91/674/EEC)                                                                                                                                                                                                                                                                                                                                                                                                                                                                                                                         | <b>Business law</b>         |
| 8 | <b>UCITS Directive:</b> DIRECTIVE 2009/65/EC OF THE EUROPEAN PARLIAMENT AND OF THE COUNCIL of 13 July 2009 on the coordination of laws, regulations and administrative provisions relating                                                                                                                                                                                                                                                                                                                                                                                                                                                                                                   | <b>Financial market law</b> |

|    |                                                                                                                                                                                                                                                                                                                                                  |                                           |
|----|--------------------------------------------------------------------------------------------------------------------------------------------------------------------------------------------------------------------------------------------------------------------------------------------------------------------------------------------------|-------------------------------------------|
|    | to undertakings for collective investment in transferable securities (UCITS)                                                                                                                                                                                                                                                                     |                                           |
| 9  | <b>Prospectus Directive:</b> DIRECTIVE 2003/71/EC OF THE EUROPEAN PARLIAMENT AND OF THE COUNCIL of 4 November 2003 on the prospectus to be published when securities are offered to the public or admitted to trading and amending Directive 2001/34/EC                                                                                          | Business law                              |
| 10 | <b>IAS-Regulation:</b> REGULATION (EC) No 1606/2002 OF THE EUROPEAN PARLIAMENT AND OF THE COUNCIL of 19 July 2002 on the application of international accounting standards                                                                                                                                                                       | Business law                              |
| 11 | <b>Consolidated standards and interpretations:</b> COMMISSION REGULATION (EC) No 1126/2008 of 3 November 2008 adopting certain international accounting standards in accordance with Regulation (EC) No 1606/2002 of the European Parliament and of the Council                                                                                  | Business law                              |
| 12 | REGULATION (EC) No 1221/2009 OF THE EUROPEAN PARLIAMENT AND OF THE COUNCIL of 25 November 2009 on the voluntary participation by organisations in a Community eco-management and audit scheme (EMAS), repealing Regulation (EC) No 761/2001 and Commission Decisions 2001/681/EC and 2006/193/EC                                                 | Business law                              |
| 13 | THE TREATY ON THE FUNCTIONING OF THE EUROPEAN UNION                                                                                                                                                                                                                                                                                              | Primary legislation of the European Union |
| 14 | <b>Accounts modernisation Directive:</b> DIRECTIVE 2003/51/EC OF THE EUROPEAN PARLIAMENT AND OF THE COUNCIL of 18 June 2003 amending Directives 78/660/EEC, 83/349/EEC, 86/635/EEC and 91/674/EEC on the annual and consolidated accounts of certain types of companies, banks and other financial institutions and insurance undertakings       | Business law                              |
| 15 | <b>Capital Requirements Directive (CRD IV):</b> DIRECTIVE 2013/36/EU OF THE EUROPEAN PARLIAMENT AND OF THE COUNCIL of 26 June 2013 on access to the activity of credit institutions and the prudential supervision of credit institutions and investment firms, amending Directive 2002/87/EC and repealing Directives 2006/48/EC and 2006/49/EC | Financial market law                      |
| 16 | <b>Capital Requirements Regulation (CRR):</b> REGULATION (EU) No 575/2013 OF THE EUROPEAN PARLIAMENT AND OF THE COUNCIL of 26 June 2013 on prudential requirements for credit institutions and investment firms and amending Regulation (EU) No 648/2012                                                                                         | Financial market law                      |
| 17 | <b>Solvency II:</b> DIRECTIVE 2009/138/EC OF THE EUROPEAN PARLIAMENT AND OF THE COUNCIL of 25 November 2009 on the taking-up and pursuit of the business of Insurance and Reinsurance (Solvency II)                                                                                                                                              | Financial market law                      |
| 18 | <b>Waste Framework Directive:</b> DIRECTIVE 2008/98/EC OF THE EUROPEAN PARLIAMENT AND OF THE COUNCIL of 19 November 2008 on waste and repealing certain Directives                                                                                                                                                                               | Circular Economy                          |
| 19 | <b>Landfilling Directive:</b> Council Directive 1999/31/EC of 26 April 1999 on the landfill of waste                                                                                                                                                                                                                                             | Circular Economy                          |
| 20 | <b>Packaging Waste Directive:</b> EUROPEAN PARLIAMENT AND COUNCIL DIRECTIVE 94/62/EC of 20 December 1994 on packaging and packaging waste                                                                                                                                                                                                        | Circular Economy                          |
| 21 | <b>Directive on end-of-life vehicles:</b> DIRECTIVE 2000/53/EC OF THE EUROPEAN PARLIAMENT AND OF THE COUNCIL of 18 September 2000 on end-of life vehicles                                                                                                                                                                                        | Circular Economy                          |

|    |                                                                                                                                                                                                                                                                                                                                                                                                                                                                                                                                         |                             |
|----|-----------------------------------------------------------------------------------------------------------------------------------------------------------------------------------------------------------------------------------------------------------------------------------------------------------------------------------------------------------------------------------------------------------------------------------------------------------------------------------------------------------------------------------------|-----------------------------|
| 22 | <b>Directive on batteries and accumulators and waste batteries and accumulators:</b> DIRECTIVE 2006/66/EC OF THE EUROPEAN PARLIAMENT AND OF THE COUNCIL of 6 September 2006 on batteries and accumulators and waste batteries and accumulators and repealing Directive 91/157/EEC                                                                                                                                                                                                                                                       | <b>Circular Economy</b>     |
| 23 | <b>Directive on waste electrical and electronic equipment:</b> DIRECTIVE 2012/19/EU OF THE EUROPEAN PARLIAMENT AND OF THE COUNCIL of 4 July 2012 on waste electrical and electronic equipment (WEEE)                                                                                                                                                                                                                                                                                                                                    | <b>Circular Economy</b>     |
| 24 | <b>Circular economy communication:</b> COMMUNICATION FROM THE COMMISSION TO THE EUROPEAN PARLIAMENT, THE COUNCIL, THE EUROPEAN ECONOMIC AND SOCIAL COMMITTEE AND THE COMMITTEE OF THE REGIONS Closing the loop - An EU action plan for the Circular Economy                                                                                                                                                                                                                                                                             | <b>Circular Economy</b>     |
| 25 | <b>CMU Communication:</b> COMMUNICATION FROM THE COMMISSION TO THE EUROPEAN PARLIAMENT, THE COUNCIL, THE EUROPEAN ECONOMIC AND SOCIAL COMMITTEE AND THE COMMITTEE OF THE REGIONS Action Plan on Building a Capital Markets Union                                                                                                                                                                                                                                                                                                        | <b>Financial market law</b> |
| 26 | <b>Communication on CSR:</b> COMMUNICATION FROM THE COMMISSION TO THE EUROPEAN PARLIAMENT, THE COUNCIL, THE EUROPEAN ECONOMIC AND SOCIAL COMMITTEE AND THE COMMITTEE OF THE REGIONS A renewed EU strategy 2011-14 for Corporate Social Responsibility                                                                                                                                                                                                                                                                                   | <b>Business law</b>         |
| 27 | COMMISSION RECOMMENDATION of 30 May 2001 on the recognition, measurement and disclosure of environmental issues in the annual accounts and annual reports of companies (notified under document number C(2001) 1495) (2001/453/EC)                                                                                                                                                                                                                                                                                                      | <b>Business law</b>         |
| 28 | Prudential assessment of acquisitions and increase of shareholdings ***I European Parliament legislative resolution of 13 March 2007 on the proposal for a directive of the European Parliament and of the Council amending Council Directive 92/49/EEC and Directives 2002/83/EC, 2004/39/EC, 2005/68/EC and 2006/48/EC as regards procedural rules and evaluation criteria for the <b>prudential assessment</b> of acquisitions and increase of shareholdings in the financial sector (COM(2006)0507 — C6-0298/2006 — 2006/0166(COD)) | <b>Business law</b>         |
| 29 | <b>MiFIR:</b> REGULATION (EU) No 600/2014 OF THE EUROPEAN PARLIAMENT AND OF THE COUNCIL of 15 May 2014 on markets in financial instruments and amending Regulation (EU) No 648/2012                                                                                                                                                                                                                                                                                                                                                     | <b>Financial market law</b> |
| 30 | <b>MiFID 2:</b> DIRECTIVE 2014/65/EU OF THE EUROPEAN PARLIAMENT AND OF THE COUNCIL of 15 May 2014 on markets in financial instruments and amending Directive 2002/92/EC and Directive 2011/61/EU (recast)                                                                                                                                                                                                                                                                                                                               | <b>Financial market law</b> |
| 31 | DIRECTIVE 2006/43/EC OF THE EUROPEAN PARLIAMENT AND OF THE COUNCIL of 17 May 2006 on statutory audits of annual accounts and consolidated accounts, amending Council Directives 78/ 660/EEC and 83/349/EEC and repealing Council Directive 84/253/EEC                                                                                                                                                                                                                                                                                   | <b>Business law</b>         |
| 32 | DIRECTIVE 2005/56/EC OF THE EUROPEAN PARLIAMENT AND OF THE COUNCIL of 26 October 2005 on cross-border mergers of limited liability companies                                                                                                                                                                                                                                                                                                                                                                                            | <b>Business law</b>         |

|    |                                                                                                                                                                                                                                                                                                                                                                                                                                                           |                      |
|----|-----------------------------------------------------------------------------------------------------------------------------------------------------------------------------------------------------------------------------------------------------------------------------------------------------------------------------------------------------------------------------------------------------------------------------------------------------------|----------------------|
| 33 | DIRECTIVE 2009/102/EC OF THE EUROPEAN PARLIAMENT AND OF THE COUNCIL of 16 September 2009 in the area of company law on single-member private limited liability companies (codified version)                                                                                                                                                                                                                                                               | Business law         |
| 34 | DIRECTIVE 2004/25/EC OF THE EUROPEAN PARLIAMENT AND OF THE COUNCIL of 21 April 2004 on takeover bids                                                                                                                                                                                                                                                                                                                                                      | Business law         |
| 35 | <b>Shareholder Rights Directive:</b> DIRECTIVE 2007/36/EC OF THE EUROPEAN PARLIAMENT AND OF THE COUNCIL of 11 July 2007 on the exercise of certain rights of shareholders in listed companies                                                                                                                                                                                                                                                             | Business law         |
| 36 | DIRECTIVE 2002/87/EC OF THE EUROPEAN PARLIAMENT AND OF THE COUNCIL of 16 December 2002 on the supplementary supervision of credit institutions, insurance undertakings and investment firms in a financial conglomerate and amending Council Directives 73/239/EEC, 79/267/EEC, 92/49/EEC, 92/96/EEC, 93/6/EEC and 93/22/EEC, and Directives 98/78/EC and 2000/12/EC of the European Parliament and of the Council                                        | Financial market law |
| 37 | DIRECTIVE 2014/59/EU OF THE EUROPEAN PARLIAMENT AND OF THE COUNCIL of 15 May 2014 establishing a framework for the recovery and resolution of credit institutions and investment firms and amending Council Directive 82/891/EEC, and Directives 2001/24/EC, 2002/47/EC, 2004/25/EC, 2005/56/EC, 2007/36/EC, 2011/35/EU, 2012/30/EU and 2013/36/EU, and Regulations (EU) No 1093/2010 and (EU) No 648/2012, of the European Parliament and of the Council | Financial market law |
| 38 | DIRECTIVE 2014/49/EU OF THE EUROPEAN PARLIAMENT AND OF THE COUNCIL of 16 April 2014 on deposit guarantee schemes                                                                                                                                                                                                                                                                                                                                          | Financial market law |
| 39 | REGULATION (EC) No 1060/2009 OF THE EUROPEAN PARLIAMENT AND OF THE COUNCIL of 16 September 2009 on credit rating agencies                                                                                                                                                                                                                                                                                                                                 | Financial market law |
| 40 | <b>Single resolution mechanism:</b> REGULATION (EU) No 806/2014 OF THE EUROPEAN PARLIAMENT AND OF THE COUNCIL of 15 July 2014 establishing uniform rules and a uniform procedure for the resolution of credit institutions and certain investment firms in the framework of a Single Resolution Mechanism and a Single Resolution Fund and amending Regulation (EU) No 1093/2010                                                                          | Financial market law |
| 41 | DIRECTIVE 2014/17/EU OF THE EUROPEAN PARLIAMENT AND OF THE COUNCIL of 4 February 2014 on credit agreements for consumers relating to residential immovable property and amending Directives 2008/48/EC and 2013/36/EU and Regulation (EU) No 1093/2010                                                                                                                                                                                                    | Financial market law |
| 42 | DIRECTIVE 2014/92/EU OF THE EUROPEAN PARLIAMENT AND OF THE COUNCIL of 23 July 2014 on the comparability of fees related to payment accounts, payment account switching and access to payment accounts with basic features                                                                                                                                                                                                                                 | Financial market law |
| 43 | REGULATION (EU) No 1286/2014 OF THE EUROPEAN PARLIAMENT AND OF THE COUNCIL of 26 November 2014 on key information documents for packaged retail and insurance-based investment products (PRIIPs)                                                                                                                                                                                                                                                          | Financial market law |
| 44 | DIRECTIVE 2007/64/EC OF THE EUROPEAN PARLIAMENT AND OF THE COUNCIL of 13 November 2007 on payment services in the internal market amending Directives 97/7/EC, 2002/65/EC, 2005/60/EC and 2006/48/EC and repealing Directive 97/5/EC                                                                                                                                                                                                                      | Financial market law |

|    |                                                                                                                                                                                                                                                                                                           |                      |
|----|-----------------------------------------------------------------------------------------------------------------------------------------------------------------------------------------------------------------------------------------------------------------------------------------------------------|----------------------|
| 45 | DIRECTIVE (EU) 2015/2366 OF THE EUROPEAN PARLIAMENT AND OF THE COUNCIL of 25 November 2015 on payment services in the internal market, amending Directives 2002/65/EC, 2009/110/EC and 2013/36/EU and Regulation (EU) No 1093/2010, and repealing Directive 2007/64/EC                                    | Financial market law |
| 46 | REGULATION (EU) No 260/2012 OF THE EUROPEAN PARLIAMENT AND OF THE COUNCIL of 14 March 2012 establishing technical and business requirements for credit transfers and direct debits in euro and amending Regulation (EC) No 924/2009                                                                       | Financial market law |
| 47 | REGULATION (EC) No 924/2009 OF THE EUROPEAN PARLIAMENT AND OF THE COUNCIL of 16 September 2009 on cross-border payments in the Community and repealing Regulation (EC) No 2560/2001                                                                                                                       | Financial market law |
| 48 | DIRECTIVE 2009/110/EC OF THE EUROPEAN PARLIAMENT AND OF THE COUNCIL of 16 September 2009 on the taking up, pursuit and prudential supervision of the business of electronic money institutions amending Directives 2005/60/EC and 2006/48/EC and repealing Directive 2000/46/EC                           | Financial market law |
| 49 |                                                                                                                                                                                                                                                                                                           |                      |
| 50 | REGULATION (EU) No 236/2012 OF THE EUROPEAN PARLIAMENT AND OF THE COUNCIL of 14 March 2012 on short selling and certain aspects of credit default swaps                                                                                                                                                   | Financial market law |
| 51 | REGULATION (EU) No 596/2014 OF THE EUROPEAN PARLIAMENT AND OF THE COUNCIL of 16 April 2014 on market abuse (market abuse regulation) and repealing Directive 2003/6/EC of the European Parliament and of the Council and Commission Directives 2003/124/EC, 2003/125/EC and 2004/72/EC                    | Financial market law |
| 52 | DIRECTIVE 2014/57/EU OF THE EUROPEAN PARLIAMENT AND OF THE COUNCIL of 16 April 2014 on criminal sanctions for market abuse (market abuse directive)                                                                                                                                                       | Financial market law |
| 53 | REGULATION (EU) 2016/1011 OF THE EUROPEAN PARLIAMENT AND OF THE COUNCIL of 8 June 2016 on indices used as benchmarks in financial instruments and financial contracts or to measure the performance of investment funds and amending Directives 2008/48/EC and 2014/17/EU and Regulation (EU) No 596/2014 | Financial market law |
| 54 | <b>AIFM:</b> DIRECTIVE 2011/61/EU OF THE EUROPEAN PARLIAMENT AND OF THE COUNCIL of 8 June 2011 on Alternative Investment Fund Managers and amending Directives 2003/41/EC and 2009/65/EC and Regulations (EC) No 1060/2009 and (EU) No 1095/2010                                                          | Financial market law |
| 55 | <b>EuVECA:</b> REGULATION (EU) No 345/2013 OF THE EUROPEAN PARLIAMENT AND OF THE COUNCIL of 17 April 2013 on European venture capital funds                                                                                                                                                               | Financial market law |
| 56 | REGULATION (EU) No 346/2013 OF THE EUROPEAN PARLIAMENT AND OF THE COUNCIL of 17 April 2013 on European social entrepreneurship funds                                                                                                                                                                      | Financial market law |
| 57 | <b>ELTIFs:</b> REGULATION (EU) 2015/760 OF THE EUROPEAN PARLIAMENT AND OF THE COUNCIL of 29 April 2015 on European long-term investment funds                                                                                                                                                             | Financial market law |
| 58 | <b>EMIR:</b> REGULATION (EU) No 648/2012 OF THE EUROPEAN PARLIAMENT AND OF THE COUNCIL of 4 July 2012 on OTC derivatives, central counterparties and trade repositories                                                                                                                                   | Financial market law |
| 59 | REGULATION (EU) No 909/2014 OF THE EUROPEAN PARLIAMENT AND OF THE COUNCIL of 23 July 2014 on improving securities                                                                                                                                                                                         | Financial market law |

|    |                                                                                                                                                                                                                                                                                                                              |                                           |
|----|------------------------------------------------------------------------------------------------------------------------------------------------------------------------------------------------------------------------------------------------------------------------------------------------------------------------------|-------------------------------------------|
|    | settlement in the European Union and on central securities depositories and amending Directives 98/26/EC and 2014/65/EU and Regulation (EU) No 236/2012                                                                                                                                                                      |                                           |
| 60 | DIRECTIVE 98/26/EC OF THE EUROPEAN PARLIAMENT AND OF THE COUNCIL of 19 May 1998 on settlement finality in payment and securities settlement systems                                                                                                                                                                          | Financial market law                      |
| 61 | DIRECTIVE 2002/47/EC OF THE EUROPEAN PARLIAMENT AND OF THE COUNCIL of 6 June 2002 on financial collateral arrangements                                                                                                                                                                                                       | Financial market law                      |
| 62 | DIRECTIVE (EU) 2016/97 OF THE EUROPEAN PARLIAMENT AND OF THE COUNCIL of 20 January 2016 on insurance distribution (recast)                                                                                                                                                                                                   | Financial market law                      |
| 63 | <b>IORP:</b> DIRECTIVE 2003/41/EC OF THE EUROPEAN PARLIAMENT AND OF THE COUNCIL of 3 June 2003 on the activities and supervision of institutions for occupational retirement provision                                                                                                                                       | Financial market law                      |
| 64 | REGULATION (EU) No 1093/2010 OF THE EUROPEAN PARLIAMENT AND OF THE COUNCIL of 24 November 2010 establishing a European Supervisory Authority (European Banking Authority), amending Decision No 716/2009/EC and repealing Commission Decision 2009/78/EC                                                                     | Financial market law                      |
| 65 | REGULATION (EU) No 1094/2010 OF THE EUROPEAN PARLIAMENT AND OF THE COUNCIL of 24 November 2010 establishing a European Supervisory Authority (European Insurance and Occupational Pensions Authority), amending Decision No 716/2009/EC and repealing Commission Decision 2009/79/EC                                         | Financial market law                      |
| 66 | REGULATION (EU) No 1095/2010 OF THE EUROPEAN PARLIAMENT AND OF THE COUNCIL of 24 November 2010 establishing a European Supervisory Authority (European Securities and Markets Authority), amending Decision No 716/2009/EC and repealing Commission Decision 2009/77/EC                                                      | Financial market law                      |
| 67 | REGULATION (EU) No 1092/2010 OF THE EUROPEAN PARLIAMENT AND OF THE COUNCIL of 24 November 2010 on European Union macro-prudential oversight of the financial system and establishing a European Systemic Risk Board                                                                                                          | Financial market law                      |
| 68 | REGULATION (EU) No 462/2013 OF THE EUROPEAN PARLIAMENT AND OF THE COUNCIL of 21 May 2013 amending Regulation (EC) No 1060/2009 on credit rating agencies                                                                                                                                                                     | Financial market law                      |
| 69 | <b>Communication on a sustainable European future:</b><br>COMMUNICATION FROM THE COMMISSION TO THE EUROPEAN PARLIAMENT, THE COUNCIL, THE EUROPEAN ECONOMIC AND SOCIAL COMMITTEE AND THE COMMITTEE OF THE REGIONS:<br>Next steps for a sustainable European future - European action for sustainability {SWD(2016) 390 final} | Sustainable Development                   |
| 70 | <b>Europe 2020 Strategy:</b> COMMUNICATION FROM THE COMMISSION EUROPE 2020 A strategy for smart, sustainable and inclusive growth                                                                                                                                                                                            | Business law                              |
| 71 | TREATY OF LISBON AMENDING THE TREATY ON EUROPEAN UNION AND THE TREATY ESTABLISHING THE EUROPEAN COMMUNITY (2007/C 306/01)                                                                                                                                                                                                    | Primary legislation of the European Union |
| 72 | COMMUNICATION FROM THE COMMISSION TO THE EUROPEAN PARLIAMENT, THE COUNCIL, THE EUROPEAN ECONOMIC AND                                                                                                                                                                                                                         | Business law                              |

|    |                                                                                                                                                                                                                                                                                                                                                                                                                                        |                             |
|----|----------------------------------------------------------------------------------------------------------------------------------------------------------------------------------------------------------------------------------------------------------------------------------------------------------------------------------------------------------------------------------------------------------------------------------------|-----------------------------|
|    | SOCIAL COMMITTEE AND THE COMMITTEE OF THE REGIONS<br>Single Market Act II Together for new growth                                                                                                                                                                                                                                                                                                                                      |                             |
| 73 | COMMUNICATION FROM THE COMMISSION TO THE EUROPEAN PARLIAMENT, THE COUNCIL, THE ECONOMIC AND SOCIAL COMMITTEE AND THE COMMITTEE OF THE REGIONS Single Market Act Twelve levers to boost growth and strengthen confidence "Working together to create new growth"                                                                                                                                                                        | <b>Business law</b>         |
| 74 | DIRECTIVE 2009/125/EC OF THE EUROPEAN PARLIAMENT AND OF THE COUNCIL of 21 October 2009 establishing a framework for the setting of ecodesign requirements for energy-related products (recast)                                                                                                                                                                                                                                         | <b>Circular Economy</b>     |
| 75 | <b>Unfair Commercial Practices Directive:</b> DIRECTIVE 2005/29/EC OF THE EUROPEAN PARLIAMENT AND OF THE COUNCIL of 11 May 2005 concerning unfair business-to-consumer commercial practices in the internal market and amending Council Directive 84/450/EEC, Directives 97/7/EC, 98/27/EC and 2002/65/EC of the European Parliament and of the Council and Regulation (EC) No 2006/2004 of the European Parliament and of the Council | <b>Business law</b>         |
| 76 | DIRECTIVE 1999/44/EC OF THE EUROPEAN PARLIAMENT AND OF THE COUNCIL of 25 May 1999 on certain aspects of the sale of consumer goods and associated guarantees                                                                                                                                                                                                                                                                           | <b>Business law</b>         |
| 77 | DIRECTIVE 2014/91/EU OF THE EUROPEAN PARLIAMENT AND OF THE COUNCIL of 23 July 2014 amending Directive 2009/65/EC on the coordination of laws, regulations and administrative provisions relating to undertakings for collective investment in transferable securities (UCITS) as regards depositary functions, remuneration policies and sanctions                                                                                     | <b>Financial market law</b> |
| 78 | REGULATION (EU) 2015/2365 OF THE EUROPEAN PARLIAMENT AND OF THE COUNCIL of 25 November 2015 on transparency of securities financing transactions and of reuse and amending Regulation (EU) No 648/2012                                                                                                                                                                                                                                 | <b>Financial market law</b> |
| 79 | DIRECTIVE 2014/50/EU OF THE EUROPEAN PARLIAMENT AND OF THE COUNCIL of 16 April 2014 on minimum requirements for enhancing worker mobility between Member States by improving the acquisition and preservation of supplementary pension rights                                                                                                                                                                                          | <b>Financial market law</b> |
| 80 | COUNCIL DIRECTIVE 98/49/EC of 29 June 1998 on safeguarding the supplementary pension rights of employed and selfemployed persons moving within the Community                                                                                                                                                                                                                                                                           | <b>Financial market law</b> |
| 81 | DIRECTIVE 2006/123/EC OF THE EUROPEAN PARLIAMENT AND OF THE COUNCIL of 12 December 2006 on services in the internal market                                                                                                                                                                                                                                                                                                             | <b>Business law</b>         |
| 82 | COUNCIL DIRECTIVE 73/239/EEC of 24 July 1973 abolishing restrictions on freedom of establishment in the business of direct insurance other than life assurance                                                                                                                                                                                                                                                                         | <b>Financial market law</b> |
| 83 | COUNCIL DIRECTIVE 64/225/EEC<br>of 25 February 1964<br>on the abolition of restrictions on freedom of establishment and freedom to provide<br>services in respect of reinsurance and retrocession                                                                                                                                                                                                                                      | <b>Financial market law</b> |
| 84 | DIRECTIVE 2002/92/EC OF THE EUROPEAN PARLIAMENT AND OF THE COUNCIL<br>of 9 December 2002<br>on insurance mediation                                                                                                                                                                                                                                                                                                                     | <b>Financial market law</b> |
| 85 | DIRECTIVE 2001/34/EC OF THE EUROPEAN PARLIAMENT AND OF THE COUNCIL<br>of 28 May 2001                                                                                                                                                                                                                                                                                                                                                   | <b>Financial market law</b> |

|    |                                                                                                                                                                                                                                                                                                                                                                                                                      |                                |
|----|----------------------------------------------------------------------------------------------------------------------------------------------------------------------------------------------------------------------------------------------------------------------------------------------------------------------------------------------------------------------------------------------------------------------|--------------------------------|
|    | on the admission of securities to official stock exchange listing and on information to be published on those securities                                                                                                                                                                                                                                                                                             |                                |
| 86 | DIRECTIVE 2002/65/EC OF THE EUROPEAN PARLIAMENT AND OF THE COUNCIL of 23 September 2002 concerning the distance marketing of consumer financial services and amending Council Directive 90/619/EEC and Directives 97/7/EC and 98/27/EC                                                                                                                                                                               | <b>Financial market law</b>    |
| 87 | DIRECTIVE 2007/44/EC OF THE EUROPEAN PARLIAMENT AND OF THE COUNCIL of 5 September 2007 amending Council Directive 92/49/EEC and Directives 2002/83/EC, 2004/39/EC, 2005/68/EC and 2006/48/EC as regards procedural rules and evaluation criteria for the prudential assessment of acquisitions and increase of holdings in the financial sector                                                                      | <b>Financial market law</b>    |
| 88 | COUNCIL DIRECTIVE 73/240/EEC of 24 July 1973 abolishing restrictions on freedom of establishment in the business of direct insurance other than life assurance                                                                                                                                                                                                                                                       | <b>Financial market law</b>    |
| 89 | COMMISSION STAFF WORKING DOCUMENT Key European action supporting the 2030 Agenda and the Sustainable Development Goals Accompanying the document Communication from the Commission to the European Parliament, the Council, the European Economic and Social Committee and the Committee of the Regions Next steps for a sustainable European future: European Union action for sustainability {COM(2016) 739 final} | <b>Sustainable Development</b> |
| 90 | COMMUNICATION FROM THE COMMISSION TO THE EUROPEAN PARLIAMENT, THE EUROPEAN COUNCIL, THE COUNCIL, THE EUROPEAN CENTRAL BANK, THE EUROPEAN ECONOMIC AND SOCIAL COMMITTEE AND THE COMMITTEE OF THE REGIONS Action Plan: Financing Sustainable Growth                                                                                                                                                                    | <b>Financial market law</b>    |
| 91 | DIRECTIVE (EU) 2016/2341 OF THE EUROPEAN PARLIAMENT AND OF THE COUNCIL of 14 December 2016 on the activities and supervision of institutions for occupational retirement provision (IORPs) (recast)                                                                                                                                                                                                                  | <b>Financial market law</b>    |
| 92 | DIRECTIVE (EU) 2017/1132 OF THE EUROPEAN PARLIAMENT AND OF THE COUNCIL of 14 June 2017 relating to certain aspects of company law                                                                                                                                                                                                                                                                                    | <b>Business law</b>            |

**Table S2.** List of interviewees

|     |                                   |                             |
|-----|-----------------------------------|-----------------------------|
| I7  | Policy Officer                    | European Commission         |
| I9  | Policy Officer                    | European Commission         |
| I11 | Employee                          | European Parliament         |
| I14 | Member of the European Parliament | European Parliament         |
| I19 | Senior Researcher                 | Think Tank                  |
| I20 | Public Affairs Expert             | Public Affairs Organization |
